# Supplementary figures and images for: An analysis of the learning curve to achieve competency at colonoscopy using the JETS database
Source: PubMed Central journal article supplement — Gut. 2014 Jan 27;63(11):1746–54. doi: 10.1136/gutjnl-2013-305973 (PMC4215302; doi:10.1136/gutjnl-2013-305973), 2014-01-27

Supplementary Figures

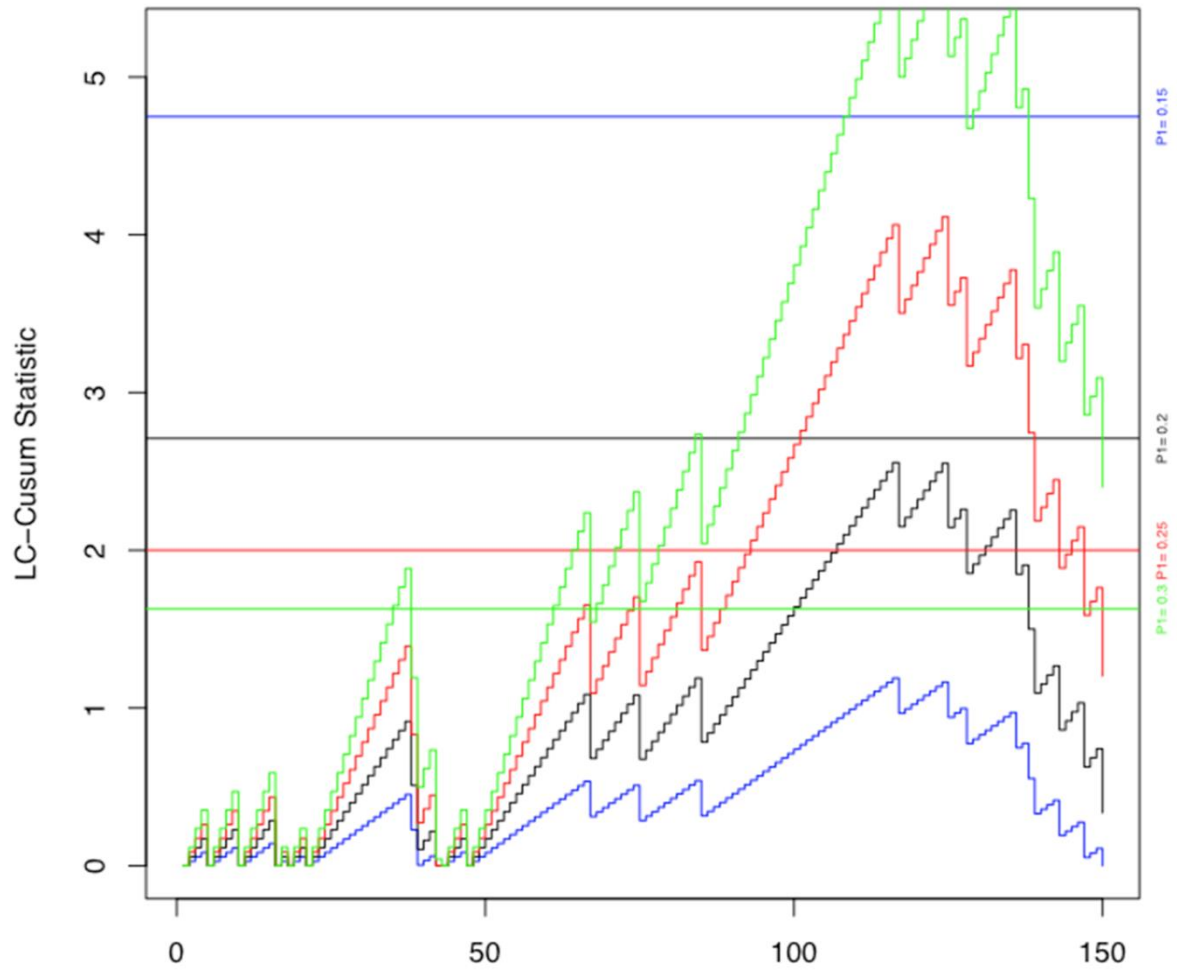

a)

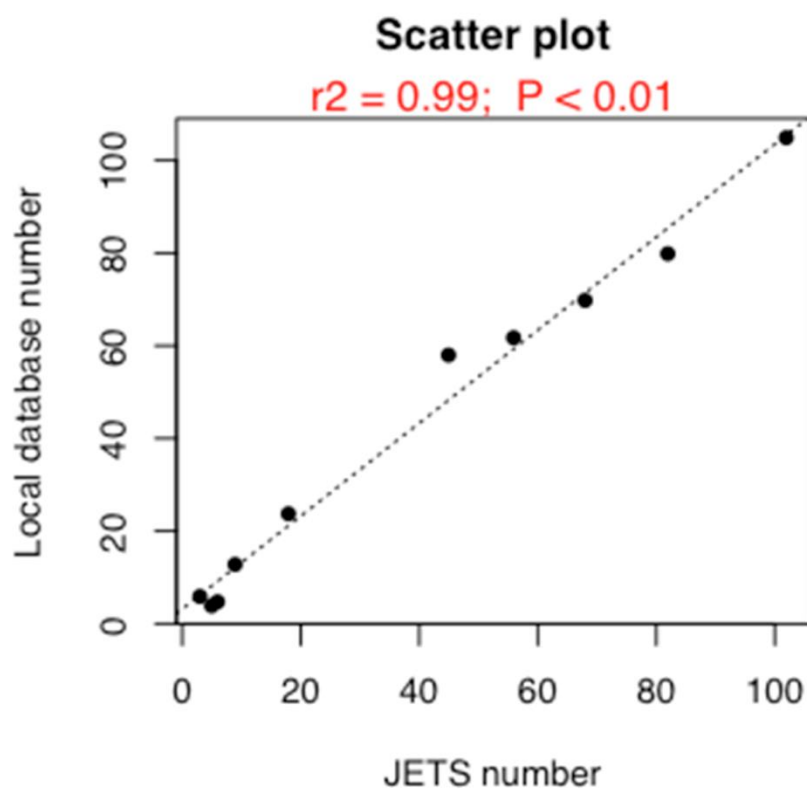

b)

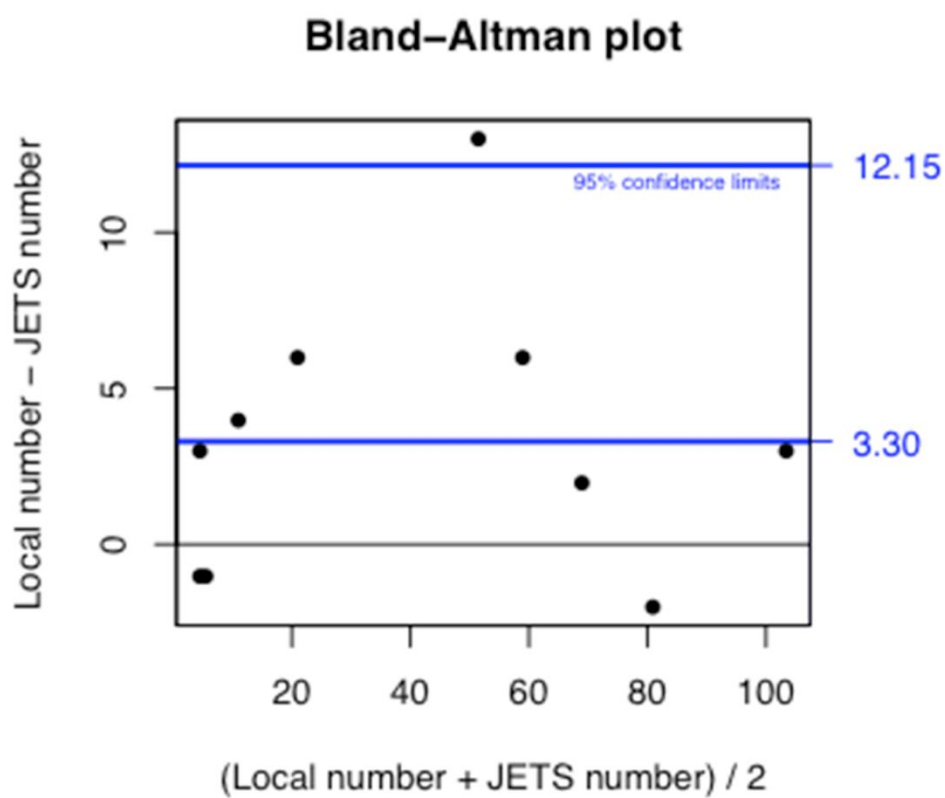

Supplement: gutjnl-2013-305973-s1.pdf [file gutjnl-2013-305973-s1.pdf]
